# Supplementary material for: Biomass, Essential Oil Yield, and Composition of Marjoram as Influenced by Interactions of Different Agronomic Practices under Controlled Conditions
Source: MDPI journal article supplement (doi:10.3390/plants12010173), 2022-12-30
Supplement: s1 [file s1]

## Article

# Biomass, Essential Oil Yield, and Composition of Marjoram as Influenced by Interactions of Different Agronomic Practices under Controlled Conditions

Mantwampe Johleen Malaka <sup>1,2</sup>, Nadia Alcina Araya <sup>1</sup>, Puffy Soundy <sup>2</sup>, Christian Phillipus du Plooy <sup>1</sup>, Hints Tesfamicael Araya <sup>1</sup>, Willem Sternburg Jansen Van Rensburg <sup>1</sup>, Eric Watkinson <sup>3</sup>, Ellis Levember <sup>4</sup>, Ebrahim Wadiwala <sup>5</sup> and Stephen Oluwaseun Amoo <sup>1,6,7,\*</sup>

<sup>1</sup> Agricultural Research Council-Vegetable, Industrial and Medicinal Plants, Private Bag X293, Pretoria 0001, South Africa

<sup>2</sup> Department of Crop Sciences, Tshwane University of Technology, Private Bag X680, Pretoria 0001, South Africa

<sup>3</sup> Department of Science and Innovation, Private Bag X894, Pretoria 0001, South Africa

<sup>4</sup> South African Essential Oils Business Incubator, 19 Mountain Street, Derdepoort 0186, Pretoria, South Africa

<sup>5</sup> Council for Scientific and Industrial Research, P.O. Box 395, Meiring Naude Road, Brummeria, Pretoria 0001, South Africa

<sup>6</sup> Department of Botany and Plant Biotechnology, University of Johannesburg, P.O. Box 524, Auckland Park, Johannesburg 2006, South Africa

<sup>7</sup> Indigenous Knowledge Systems Centre, Faculty of Natural and Agricultural Sciences, North-West University, Private Bag X2046, Mmabatho 2790, South Africa

\* Correspondence: amoos@arc.agric.za

**Citation:** Malaka, M.J.; Araya, N.A.; Soundy, P.; du Plooy, C.P.; Araya, H.T.; Jansen Van Rensburg, W.S.; Watkinson, E.; Levember, E.; Wadiwala, E.; Amoo, S.O. Biomass, Essential Oil Yield, and Composition of Marjoram as Influenced by Interactions of Different Agronomic Practices under Controlled Conditions. *Plants* **2023**, *12*, 173. <https://doi.org/10.3390/plants12010173>

Academic Editors: Mariateresa Cardarelli and Othmane Merah

Received: 3 November 2022

Revised: 25 December 2022

Accepted: 27 December 2022

Published: 30 December 2022

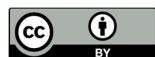

**Copyright:** © 2022 by the authors. Licensee MDPI, Basel, Switzerland. This article is an open access article distributed under the terms and conditions of the Creative Commons Attribution (CC BY) license (<https://creativecommons.org/licenses/by/4.0/>).

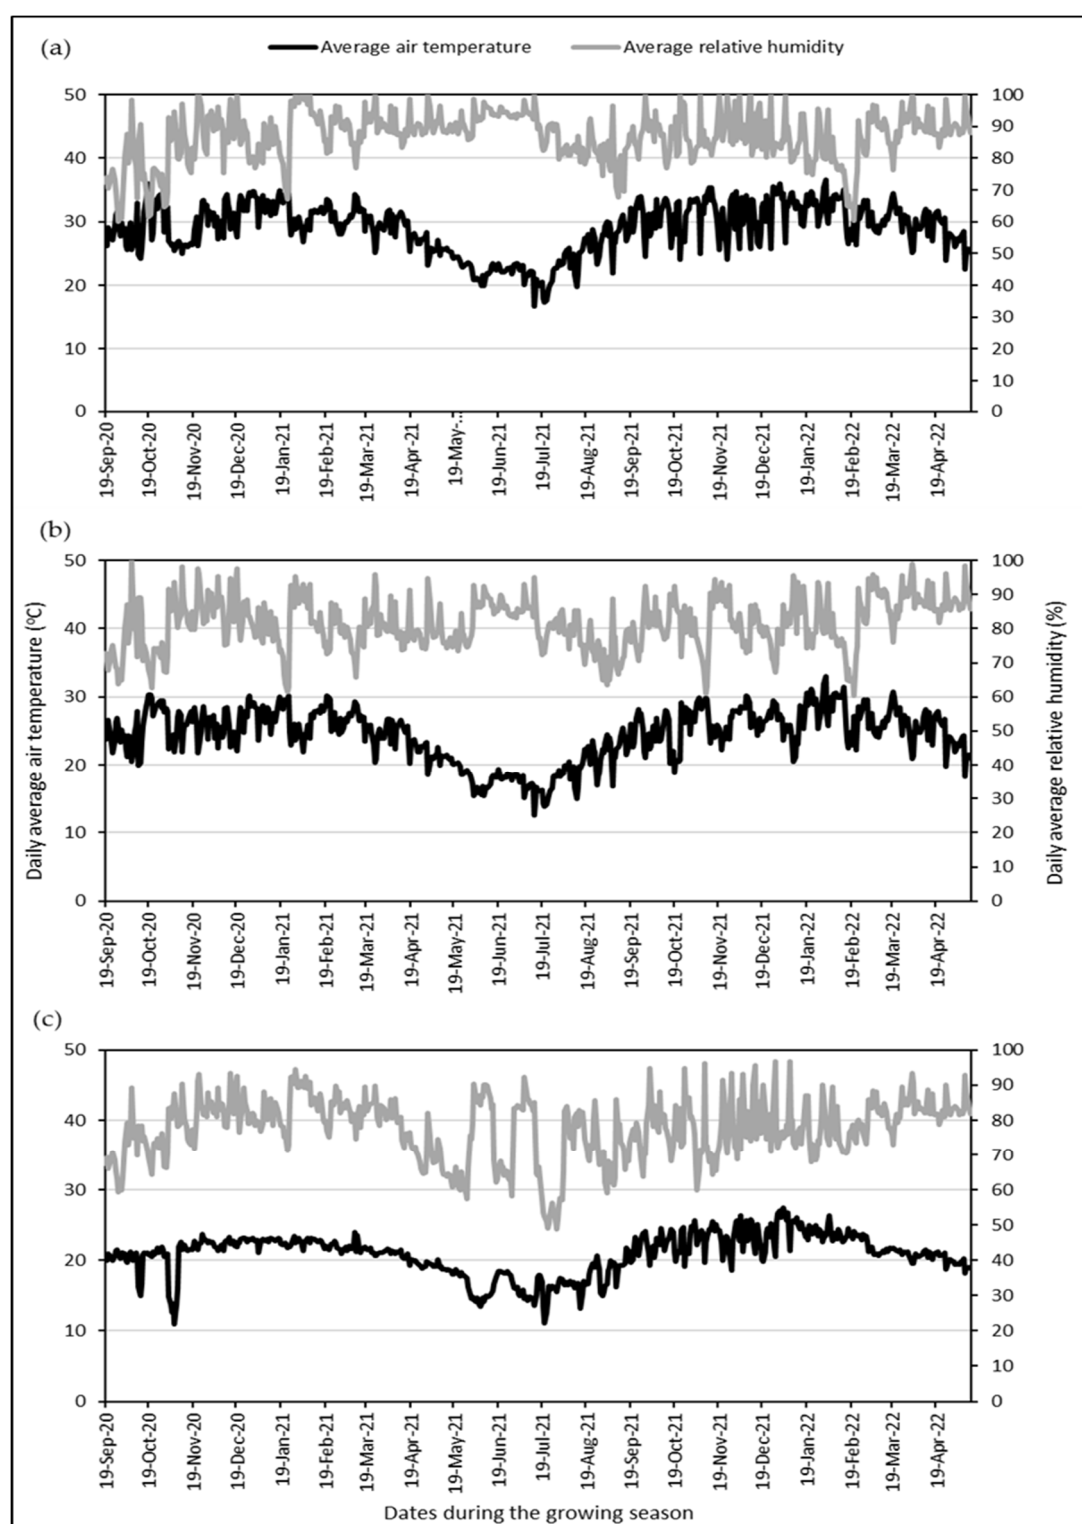

**Figure S1.** Daily average air temperature and relative humidity in the different glasshouse compartments, namely (a) high, (b) medium, and (c) low regimes during the entire plant growing season.

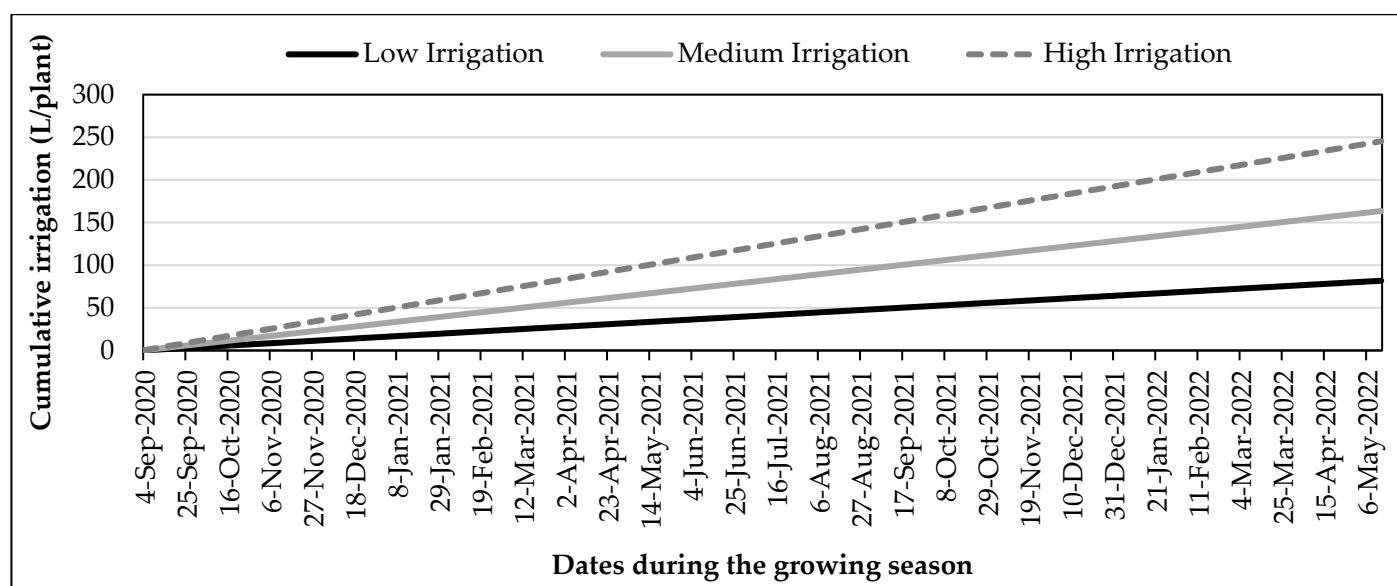

**Figure S2.** Cumulative irrigation applied per marjoram plant in glasshouse compartments from September 2020 to May 2022.

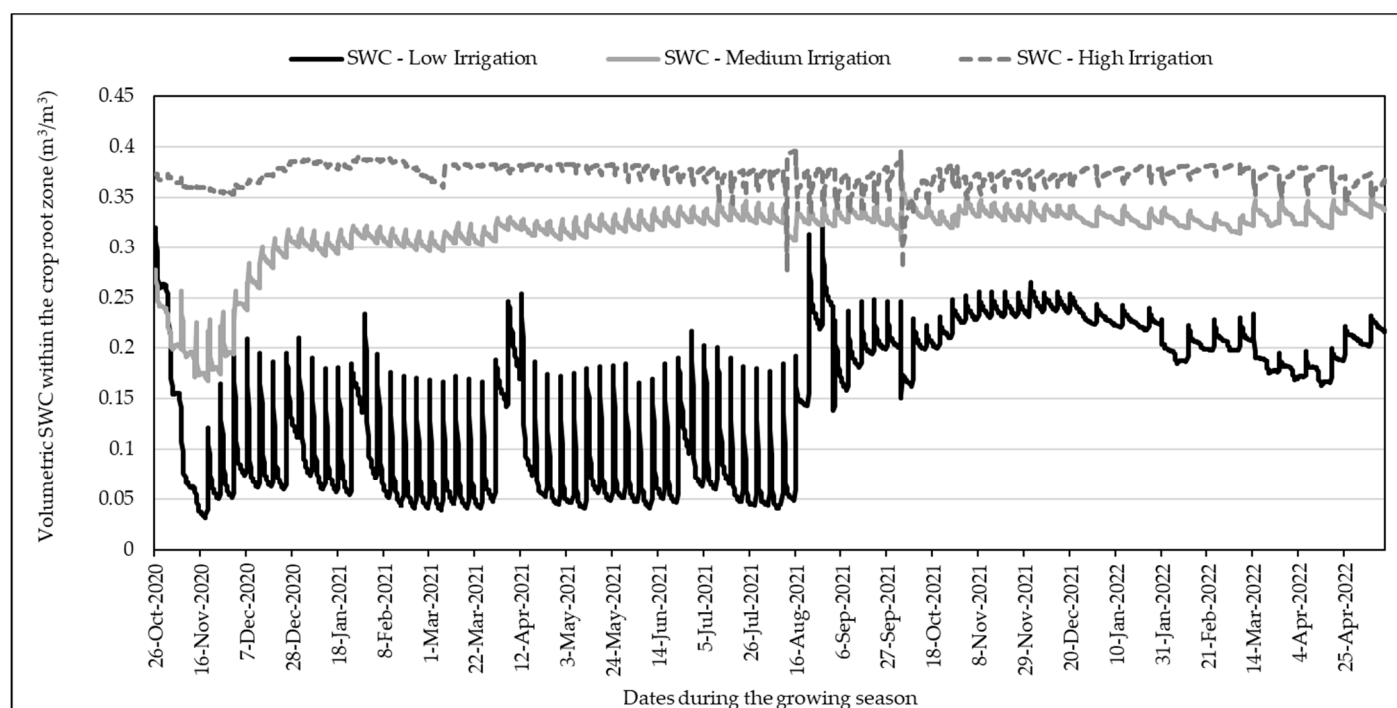

**Figure S3.** Changes in soil water content (SWC) within the crop root zone for the low, medium and high irrigation regimes.
